# Supplementary material for: Expression and Purification of Integral Membrane Fatty Acid Desaturases
Source: PubMed Central journal article supplement (PMC3592867; doi:10.1371/journal.pone.0058139), 2013-03-08
Supplement: pone.0058139.s004.pdf [file pone.0058139.s004.pdf]

FADS12  
AF110509  
AB020033  
AF417244

1 10 20 30 40 50 60 70 80 90 100 110 120 130 140 150 160

ATGGCACCCTCCCAACACTATGATGCCGGTTGACCCAGCGTCATATCAGCACC---TCGGCCCCAACTCGCCCAAGCCGGCTTCGAGCGCAACTACCAGCTCCCGAGTTCCACCATCAAGGAGATCCGGAGTGCATCCCTGCCACTGCTTTGAGCGC  
ATGGCACCCTCCCAACACTATGATGCCGGTTGACCCAGCGTCATATCAGCACC---TCGGCCCCAACTCGCCCAAGCCGGCTTCGAGCGCAACTACCAGCTCCCGAGTTCCACCATCAAGGAGATCCGGAGTGCATCCCTGCCACTGCTTTGAGCGC  
ATGGCACCCTCCCAACACTATGATGCCGGTTGACCCAGCGTCATATCAGCACC---TCGGCCCCAACTCGCCCAAGCCGGCTTCGAGCGCAACTACCAGCTCCCGAGTTCCACCATCAAGGAGATCCGGAGTGCATCCCTGCCACTGCTTTGAGCGC

M A P P N T I D A G L T Q R H I S T - S A P N S A K P A F E R N Y Q L P E F T I K E I R E C I P A H C F E R R  
M A P P N T I D A G L T Q R H I S T - S A P N S A K P A F E R N Y Q L P E F T I K E I R E C I P A H C F E R R  
M A P P N T I D A G L T Q R H I S T S A A P T S A K P A F E R N Y Q L P E F T I K E I R E C I P A H C F E R R  
M A P P N T I D A G L T Q R H I T T A A P T S A K P A F E R N Y Q L P E F T I K E I R E C I P A H C F E R R

170 180 190 200 210 220 230 240 250 260 270 280 290 300 310 320

TCCGGTCTCGTGGTCTCGCCACGTTGCCATGATCTGACTTGGGCGTCGCTCTTGTTCCTGGCTGCAACCAGATCGACAAGTTGAGAACTCCCTTGATCCGCTATTTGGCCTGGCCTGTTACTGGATCATGCAGGGATTGTTGCACCGGTGTATTGG  
TCCGGTCTCGTGGTCTCGCCACGTTGCCATGATCTGACTTGGGCGTCGCTCTTGTTCCTGGCTGCAACCAGATCGACAAGTTGAGAACTCCCTTGATCCGCTATTTGGCCTGGCCTGTTACTGGATCATGCAGGGATTGTTGCACCGGTGTATTGG  
TCCGGTCTCGTGGTCTCGCCACGTTGCCATGATCTGACTTGGGCGTCGCTCTTGTTCCTGGCTGCAACCAGATCGACAAGTTGAGAACTCCCTTGATCCGCTATTTGGCCTGGCCTGTTACTGGATCATGCAGGGATTGTTGCACCGGTGTATTGG  
TCCGGTCTCGTGGTCTCGCCACGTTGCCATGATCTGACTTGGGCGTCGCTCTTGTTCCTGGCTGCAACCAGATCGACAAGTTGAGAACTCCCTTGATCCGCTATTTGGCCTGGCCTGTTACTGGATCATGCAGGGATTGTTGCACCGGTGTATTGG

S G L R G L C H V A I D L T W A S L L F L A A T Q Q I D K F E N P L I R Y L A W P V Y W I M Q G I V C T G V W  
S G L R G L C H V A I D L T W A S L L F L A A T Q Q I D K F E N P L I R Y L A W P V Y W I M Q G I V C T G V W  
S G L R G L C H V A I D L T W A S L L F L A A T Q Q I D K F E N P L I R Y L A W P A Y W I M Q G I V C T G I W  
S G L R G L C H V A I D L T W A S L L F L A A T Q Q I D K F E N P L I R Y L A W P A Y W I M Q G I V C T G I W

330 340 350 360 370 380 390 400 410 420 430 440 450 460 470 480

GTCTGGCCACGATGTGGTCAAGTCTCTCGACCTCCAAGACCTCAACAACACAGTTGGTGGATCTGCACCTCGATGCTCTTGGTCCCCTACCACCTCTGGAGAATCTCGCAGCTCGAAGCACCACAGGCCACTGGCCATGATGACCAAGGACCAG  
GTCTGGCCACGATGTGGTCAAGTCTCTCGACCTCCAAGACCTCAACAACACAGTTGGTGGATCTGCACCTCGATGCTCTTGGTCCCCTACCACCTCTGGAGAATCTCGCAGCTCGAAGCACCACAGGCCACTGGCCATGATGACCAAGGACCAG  
GTCTGGCCACGATGTGGTCAAGTCTCTCGACCTCCAAGACCTCAACAACACAGTTGGTGGATCTGCACCTCGATGCTCTTGGTCCCCTACCACCTCTGGAGAATCTCGCAGCTCGAAGCACCACAGGCCACTGGCCATGATGACCAAGGACCAG  
GTCTGGCCACGATGTGGTCAAGTCTCTCGACCTCCAAGACCTCAACAACACAGTTGGTGGATCTGCACCTCGATGCTCTTGGTCCCCTACCACCTCTGGAGAATCTCGCAGCTCGAAGCACCACAGGCCACTGGCCATGATGACCAAGGACCAG

V L A H E C G H Q S F S T S K T L N N T V G W I L H S M L L V P Y H S W R I S H S K H H K A T G H M T K D Q  
V L A H E C G H Q S F S T S K T L N N T V G W I L H S M L L V P Y H S W R I S H S K H H K A T G H M T K D Q  
V L A H E C G H Q S F S T S K T L N N T V G W I L H S M L L V P Y H S W R I S H S K H H K A T G H M T K D Q  
V L A H E C G H Q S F S T S K T L N N T V G W I L H S M L L V P Y H S W R I S H S K H H K A T G H M T K D Q

490 500 510 520 530 540 550 560 570 580 590 600 610 620 630 640

GTCTTTGTCCCAAGACCCGCTCAGGTTGGCTTGCCTCCCAAGGAGAGAGCTGCTGCTGCCGTTTCCAGGAGGATGTCCTCGTGCACCTGGATGAGGAGGCCCTCCATTGTGACTTTGTTCTGGATGGTGATCAGTTCCTGTTCCGGATGGCCGCTGTAC  
GTCTTTGTCCCAAGACCCGCTCAGGTTGGCTTGCCTCCCAAGGAGAGAGCTGCTGCTGCCGTTTCCAGGAGGATGTCCTCGTGCACCTGGATGAGGAGGCCCTCCATTGTGACTTTGTTCTGGATGGTGATCAGTTCCTGTTCCGGATGGCCGCTGTAC  
GTCTTTGTCCCAAGACCCGCTCAGGTTGGCTTGCCTCCCAAGGAGAGAGCTGCTGCTGCCGTTTCCAGGAGGATGTCCTCGTGCACCTGGATGAGGAGGCCCTCCATTGTGACTTTGTTCTGGATGGTGATCAGTTCCTGTTCCGGATGGCCGCTGTAC  
GTCTTTGTCCCAAGACCCGCTCAGGTTGGCTTGCCTCCCAAGGAGAGAGCTGCTGCTGCCGTTTCCAGGAGGATGTCCTCGTGCACCTGGATGAGGAGGCCCTCCATTGTGACTTTGTTCTGGATGGTGATCAGTTCCTGTTCCGGATGGCCGCTGTAC

V F V P K T R S Q V G L P P K E N A A A A V Q E E D M S V H L D E E A P I V T L F W M V I Q F L F G W P A Y  
V F V P K T R S Q V G L P P K E N A A A A V Q E E D M S V H L D E E A P I V T L F W M V I Q F L F G W P A Y  
V F V P K T R S Q V G L P P K E N A A A A V Q E E D M S V H L D E E A P I V T L F W M V I Q F L F G W P A Y  
V F V P K T R S Q V G L P P K E S A A A A V Q E E D M S V H L D E E A P I V T L F W M V I Q F L F G W P A Y

650 660 670 680 690 700 710 720 730 740 750 760 770 780 790 800 810

CTCATATGAACGCCCTTGGCCAGACTAGGCCGCTGGACCTCGCACTTCCACACCTACTCTCCCATCTTTGAGCCCCGCAACTTTTCGACATTATATCTCGGACTCTGGTGTGTTGGCTGCCCTCGGTCCCTGATCTAGCTCCATGCAGTGTTCG  
CTCATATGAACGCCCTTGGCCAGACTAGGCCGCTGGACCTCGCACTTCCACACCTACTCTCCCATCTTTGAGCCCCGCAACTTTTCGACATTATATCTCGGACTCTGGTGTGTTGGCTGCCCTCGGTCCCTGATCTAGCTCCATGCAGTGTTCG  
CTCATATGAACGCCCTTGGCCAGACTAGGCCGCTGGACCTCGCACTTCCACACCTACTCTCCCATCTTTGAGCCCCGCAACTTTTCGACATTATATCTCGGACTCTGGTGTGTTGGCTGCCCTCGGTCCCTGATCTAGCTCCATGCAGTGTTCG  
CTCATATGAACGCCCTTGGCCAGACTAGGCCGCTGGACCTCGCACTTCCACACCTACTCTCCCATCTTTGAGCCCCGCAACTTTTCGACATTATATCTCGGACTCTGGTGTGTTGGCTGCCCTCGGTCCCTGATCTAGCTCCATGCAGTGTTCG

L I M N A S G Q D Y G R W T S H F H T Y S P I F E P R N F P D I I I S D L G V L A A L G A L I Y A S M Q L S  
L I M N A S G Q D Y G R W T S H F H T Y S P I F E P R N F P D I I I S D L G V L A A L G A L I Y A S M Q L S  
L I M N A S G Q D Y G R W T S H F H T Y S P I F E P R N F P D I I I S D L G V L A A L G A L I Y A S M Q L S  
L I M N A S G Q D Y G R W T S H F H T Y S P I F E P R N F P D I I I S D L G V L A A L G A L I Y A S M Q L S

820 830 840 850 860 870 880 890 900 910 920 930 940 950 960 970

CTCTTGACCGTACCAAGTACTATATGTCCTTACTCTCTTTGTCAACTTTGGTTGGTCTCTGATCACTCTTTCGAGCACACCGGATCCAAAGCTGCCCAATTACCGGAGGGTGCCTGGAAATTTCCAGCGTGGAGCTCTTGCACCGTTGACCGCTCGTTC  
CTCTTGACCGTACCAAGTACTATATGTCCTTACTCTCTTTGTCAACTTTGGTTGGTCTCTGATCACTCTTTCGAGCACACCGGATCCAAAGCTGCCCAATTACCGGAGGGTGCCTGGAAATTTCCAGCGTGGAGCTCTTGCACCGTTGACCGCTCGTTC  
CTCTTGACCGTACCAAGTACTATATGTCCTTACTCTCTTTGTCAACTTTGGTTGGTCTCTGATCACTCTTTCGAGCACACCGGATCCAAAGCTGCCCAATTACCGGAGGGTGCCTGGAAATTTCCAGCGTGGAGCTCTTGCACCGTTGACCGCTCGTTC  
CTCTTGACCGTACCAAGTACTATATGTCCTTACTCTCTTTGTCAACTTTGGTTGGTCTCTGATCACTCTTTCGAGCACACCGGATCCAAAGCTGCCCAATTACCGGAGGGTGCCTGGAAATTTCCAGCGTGGAGCTCTTGCACCGTTGACCGCTCGTTC

L L T V T K Y Y I V P Y L F V N F W L V L I T F L Q H T D P K L P H Y R E G A W N F Q R G A L C T V D R S F  
L L T V T K Y Y I V P Y L F V N F W L V L I T F L Q H T D P K L P H Y R E G A W N F Q R G A L C T V D R S F  
L L T V T K Y Y I V P Y L F V N F W L V L I T F L Q H T D P K L P H Y R E G A W N F Q R G A L C T V D R S F  
L L T V T K Y Y I V P Y L F V N F W L V L I T F L Q H T D P K L P H Y R E G A W N F Q R G A L C T V D R S F

980 990 1000 1010 1020 1030 1040 1050 1060 1070 1080 1090 1100 1110 1120 1130

GGCAAGTCTTGGACATATGTTCCACGGCATGTCCACACCCATGTGCCATCACTTGTTCGCAAAATGCCGTTCTACCATGCTGAGGAAGTACCACATCTCTCAAGAACTGCTGGGAGAGTACTACTGTGTACGACCCATCCCGATCGTCTGGC  
GGCAAGTCTTGGACATATGTTCCACGGCATGTCCACACCCATGTGCCATCACTTGTTCGCAAAATGCCGTTCTACCATGCTGAGGAAGTACCACATCTCTCAAGAACTGCTGGGAGAGTACTACTGTGTACGACCCATCCCGATCGTCTGGC  
GGCAAGTCTTGGACATATGTTCCACGGCATGTCCACACCCATGTGCCATCACTTGTTCGCAAAATGCCGTTCTACCATGCTGAGGAAGTACCACATCTCTCAAGAACTGCTGGGAGAGTACTACTGTGTACGACCCATCCCGATCGTCTGGC  
GGCAAGTCTTGGACATATGTTCCACGGCATGTCCACACCCATGTGCCATCACTTGTTCGCAAAATGCCGTTCTACCATGCTGAGGAAGTACCACATCTCTCAAGAACTGCTGGGAGAGTACTACTGTGTACGACCCATCCCGATCGTCTGGC

G K F L D H M F H G I V H T H V A H H L F S O M P F Y H A E E A T Y H L K K L L G E Y Y V Y D P S P I V V A  
G K F L D H M F H G I V H T H V A H H L F S O M P F Y H A E E A T Y H L K K L L G E Y Y V Y D P S P I V V A  
G K F L D H M F H G I V H T H V A H H L F S O M P F Y H A E E A T Y H L K K L L G E Y Y V Y D P S P I V V A  
G K F L D H M F H G I V H T H V A H H L F S O M P F Y H A E E A T Y H L K K L L G E Y Y V Y D P S P I V V A

1140 1150 1160 1170 1180 1190 1203

GTCTGGAGTCTGCTCCGTCAGTGGCCATTCTGGTGAAGTACAGGGAGACGTGGTCTTTTTCAAGAAGTAA  
GTCTGGAGTCTGCTCCGTCAGTGGCCATTCTGGTGAAGTACAGGGAGACGTGGTCTTTTTCAAGAAGTAA  
GTCTGGAGTCTGCTCCGTCAGTGGCCATTCTGGTGAAGTACAGGGAGACGTGGTCTTTTTCAAGAAGTAA  
GTCTGGAGTCTGCTCCGTCAGTGGCCATTCTGGTGAAGTACAGGGAGACGTGGTCTTTTTCAAGAAGTAA

V W R S F R E C R F V E D Q G D V V F F K K  
V W R S F R E C R F V E D Q G D V V F F K K  
V W R S F R E C R F V E D H G D V V F F K K  
V W R S F R E C R F V E D H G D V V F F K K

Figure S4
